# Supplementary material for: 「JIS L 0803染色堅ろう度試験用添付白布」の物理的性質について
Source: MDPI journal article supplement (doi:10.3390/cells11152400), 1977-01-01

**Figure S1.** Correlation analysis of CHST7 and POU1F1 (A), SSTR2 (B) and DLL3 (C).

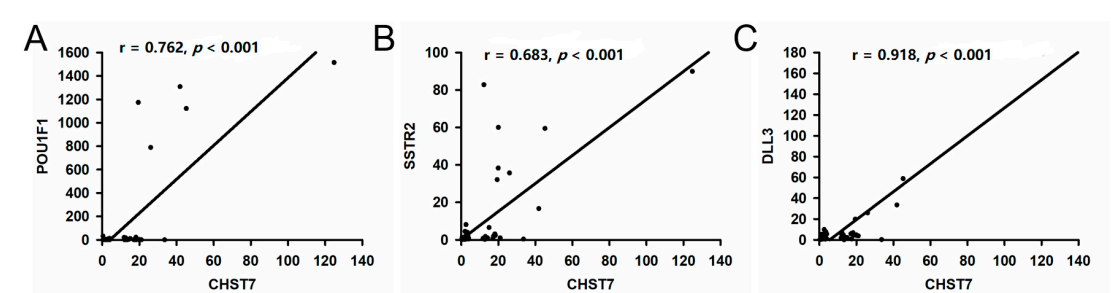

**Figure S2.** Correlation analysis of CHST7 and mitochondrion-related genes. LAMP1 (A), OPA1 (B) and TOMM20 (C)

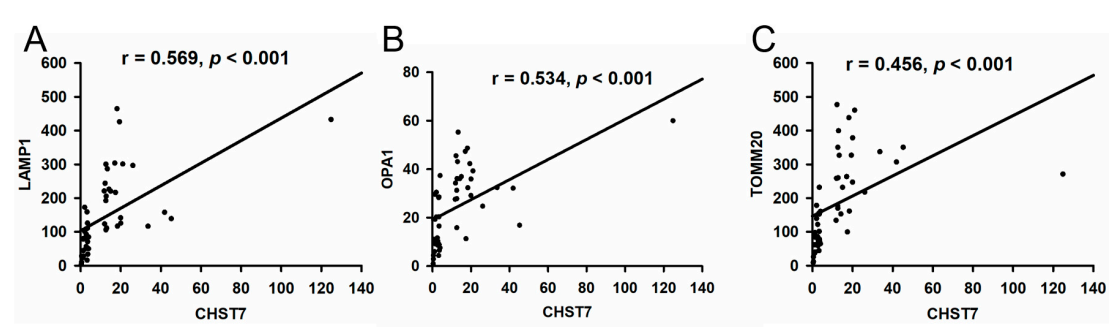

**Figure S3.** IHC pictures of transcription factors. Bar = 100  $\mu$ m

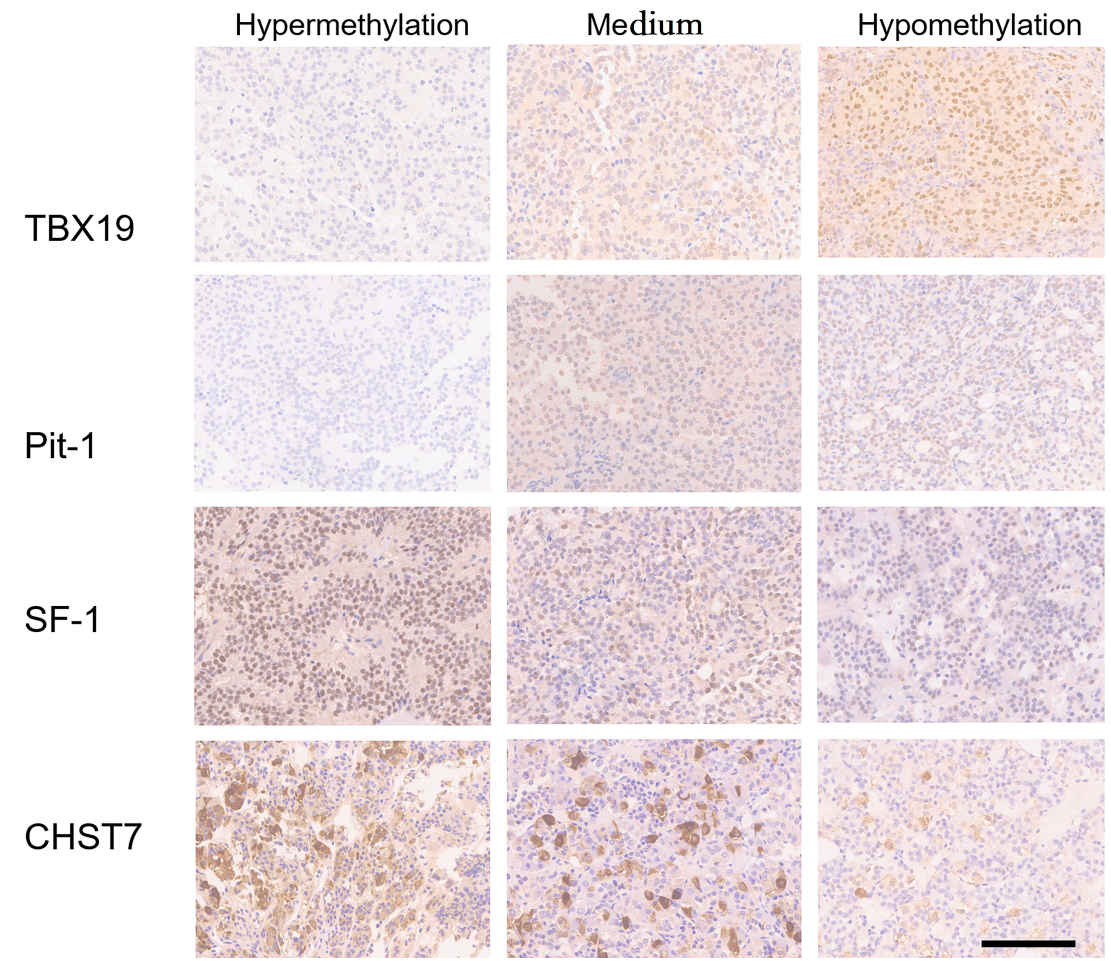

Figure S4. IHC pictures of receptors. Bar = 100  $\mu$ m

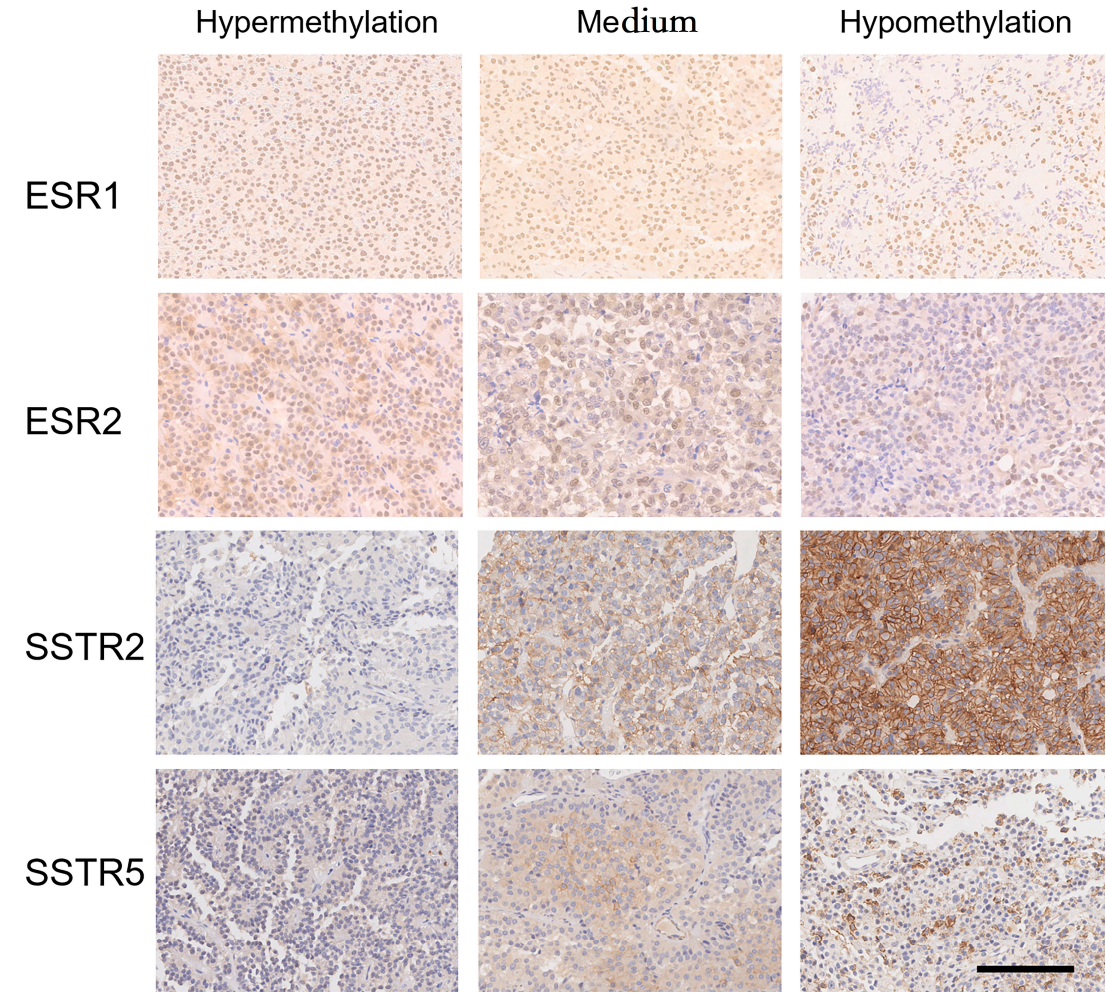

Supplement: s1 [file s1]
